# Supplementary material for: Protective effect of Rhus coriaria fruit extracts against hydrogen peroxide-induced oxidative stress in muscle progenitors and zebrafish embryos
Source: PeerJ. 2017 Dec 12;5:e4144. doi: 10.7717/peerj.4144 (PMC5731335; doi:10.7717/peerj.4144)
Supplement: Data S1 [file peerj-05-4144-s001.xlsx]

## Sheet: CE and EtOAc Cyto
Figure 2
	CE	24 h						48h					72h
	CTRL	100	100	100				100	100	100			100	100	100
	VHCL	93	100	98				93	94	90			99	90	88
	1	100	90	100				100	99	90			100	99	91
	3	100	100	97				97	95	95			95	92	92
	10	88	71	82				77	78	63			80	78	78
	30	70	65	72				63	59	66			65	68	72
	60	36	28	17				18	0	8			23	10	9
	90	0	0	0				0	0	0			0	0	0
	ETOAc	24 h						48h					72h
	CTRL	100	100	100				100	100	100			100	100	100
	VHCL	97	94	98				95	95	90			96	95	94
	1	90	99	93				90	89	93			89	89	92
	3	94	91	90				89	90	90			81	89	90
	10	85	91	87				60	64	70			74	75	80
	30	25	30	40				8	5	15			3	6	15
	60	15	10	11				7	4	6			3	4	4
	90	14	10	10				8	3	6			3	3	3

## Sheet: H2O2 et PreG0
	Figure 3
			sans H2O2						avec H2O2
	CTRL	100	100	100				57	59	55
	CE 1	95	97	97				85	86	85
	CE 3	99.7	96	97				83	77	80
	EtOAc 1	97.9	95	96				80	85	85
	EtOAc 3	93	95	92				90	77	88.7
	VitC 1	95	97	95				76	82	80
	PreG0	Figure 5
			sans H2O2						avec H2O2
	CTRL	4.15	4.12	4.15				20.4	19.7	20.4
	CE 1	4.62	4.62	5				4	3.86	3.85
	EtOAc 1	5	4.5	4.3				4.59	4	4
	EtOAc 3	6.74	6.3	5.8				6.03	6.16	5.1
	Vit C 1	4.07	4.07	5.8				3.54	6.08	7.34
	Adhesion Test		Figure 6
			sans H2O2						avec H2O2
	CTRL	100	100	100				54.375	54.4	51.8
	CE 1	95	98	95				90	88	85
	EtOAc 1	100	98	98				95	85	90
	EtOAc 3	94	92	95				80	85	90

## Sheet: Enzyme
				SOD				GPx3					Catalase
		CTRL	1.7	1.8			2	2.05				0.2	0.2
		EtOAc 1	3	3.2			1	1.05				1.5	1.5
		EtOAc 3	1.4	1.5			0.1	0.12				1	1
		VitC 1	2.1	2.2			0.12	0.14				1	1
				MyoD				Myf5					Myogenin
		CTRL	2.2	2.1			5	5.3				0.0182	0.02
		EtAOc 1	2.2	1.8			1.2	1.1				0.00345	0.0042
		EtAOc 3	2	1.7			1.1	1				0.00346	0.0032
		VitC 1	2	1.8			1	1.1				0.00334	0.0045

## Sheet: CE zebrafish
	Figure 8
		24h						48h
	CTRL	100	100	100				100	100	100
	VHCL	93.34	95	100				90	86.67	100
	1	95.45	95	100				95	95.45	100
	3	95.45	95	100				90	95.45	100
	10	95	95	95				95	94.74	95
	30	80	85	80				80	77.27	75
	60	69.23	68.19	70				68.19	69.23	70
	90	54	53	50				53	53	50
	120	30	30	35				10.53	13.63	20
		72h						96h
	CTRL	100	100	100				100	100	100
	VHCL	90	86.67	100				90	90	100
	1	90	95.45	100				90	95.45	100
	3	85	95.45	100				85	95.45	100
	10	95	94.74	95				95	94.74	95
	30	80	77.27	75				80	77.27	70
	60	68.19	69.23	65				58.34	69.23	60
	90	50	45	45				45	40	45
	120	10.53	13.63	15				10.53	13.63	14

## Sheet: EtOAc Zf
	Figure 8
		24h						48h
	CTRL	100	100	100				100	100	100
	VHCL	100	88	96.43				100	88	96.43
	1	95.24	85	95.24				95.24	85	95.24
	3	90	80	90				90	80	90
	10	85.71	80	85.71				85.71	80	85.71
	30	75	73.34	75				70	73.34	70
	60	65	65	60				60	63	65
	90	61	60	61				59	59	59
	120	42.1	36	30				42.1	36.37	30
		72h						96h
	CTRL	100	100	100				100	100	100
	VHCL	100	88	96.43				100	88	96.43
	1	95.24	85	95.24				95.24	85	95.24
	3	90	80	90				90	80	90
	10	85	80	85				85	80	85
	30	70	73.34	70				70	71	70
	60	60	63	65				65	55.56	65
	90	59	60	59				50	50	52
	120	42.1	36.37	30				31.58	36.37	30

## Sheet: Zf H2O2
		Figure 10
				avec H2O2			Sans H2O2
		Ctrl	100	99			40	39
		CE 1	100	99			35	39
		CE 3	95	94			35	36
		EtOAc 1	95	97			89	88
		EtOAc 3	94	95			75	76
		Vit C	95	94			68	70
